# Supplementary material
Source: PubMed Central journal article supplement (PMC5805648)
Supplement: NIHMS922666-supplement-1.pdf [file NIHMS922666-supplement-1.pdf]

1 Table. S1. Physical characterizations of nanoliposomal irinotecan (nal-IRI) for *in vivo* study.

| <b>Formulation</b> | <b>Hydrodynamic diameter</b> | <b>Polydispersity index (PDI)</b> | <b>Entrapment efficiency (%)*</b> | <b>Number of molecules <i>per</i> liposome</b> |
|--------------------|------------------------------|-----------------------------------|-----------------------------------|------------------------------------------------|
| <b>nal-IRI</b>     | 115.7 ± 4.2                  | 0.046 ± 0.028                     | 66.4 ± 1.2                        | ~16,000                                        |

\* The molar ratio of drug entrapped into nanoliposome to the total drug added initially
