# Supplementary material
Source: PubMed Central journal article supplement (PMC5805648)
Supplement: NIHMS922666-supplement-2.pdf [file NIHMS922666-supplement-2.pdf]

1 Table. S2. Comparison of minocycline and irinotecan doses used in this study versus in clinic.

| Treatment (component)            | Clinical human dose                                                                           | Mouse dose used in this study                                                             |
|----------------------------------|-----------------------------------------------------------------------------------------------|-------------------------------------------------------------------------------------------|
| <b>Antibiotic (Minocycline)</b>  | 200 mg <i>per</i> day (P.O.)<br>Serum conc. ( $C_{max}$ , 3–4 $\mu\text{g/mL}$ )              | 50 mg/kg followed by 25 mg/kg (I.P.)<br>Serum conc. ( $C_{max}$ , 5–10 $\mu\text{g/mL}$ ) |
| <b>Chemotherapy (Irinotecan)</b> | 175–300 $\text{mg/m}^2$ (I.V.)<br>(Mouse equivalent dose: 58–100 mg/kg)*<br>Average: 6 cycles | 20 mg/kg (I.V.)<br>(Human equivalent dose: 60 mg/kg)*<br>3 cycles                         |

\* Translation of clinical human dose to animal equivalent dose was achieved *via* body surface area normalization method

- Oral administration (P.O.)
- Intravenous administration (I.V.)
- Intraperitoneal injection (I.P.)
