# Supplementary material
Source: PubMed Central journal article supplement (PMC5805648)
Supplement: NIHMS922666-supplement-3.pdf [file NIHMS922666-supplement-3.pdf]

1 Table. S3. Preliminary analysis of combining minocycline and irinotecan regimen indicates  
 2 significant cost savings compared to other irinotecan-based combination therapies.

| Drug                                       | Minocycline + Irinotecan |                     | Bevacizumab + Irinotecan    |                            | Etoposide + Irinotecan     |                            |
|--------------------------------------------|--------------------------|---------------------|-----------------------------|----------------------------|----------------------------|----------------------------|
|                                            | Minocycline              | Irinotecan          | Bevacizumab                 | Irinotecan                 | Etoposide                  | Irinotecan                 |
| <b>Standard dose</b>                       | 100 mg/day               | 218 mg <sup>c</sup> | 375 mg <sup>g</sup>         | 105 mg                     | 50 mg <sup>i</sup>         | 105 mg                     |
| <b>Cost per dose</b>                       | \$0.50 <sup>a</sup>      | \$133 <sup>d</sup>  | \$2,700 <sup>a</sup>        | \$66                       | \$12 <sup>a</sup>          | \$66                       |
| <b># of treatments</b>                     | 180 <sup>b</sup>         | 24 <sup>e</sup>     | 12 <sup>g</sup>             | 18                         | 168 <sup>j</sup>           | 16                         |
| <b>Total cost of drug</b>                  | <b>\$90</b>              | <b>\$3,192</b>      | <b>\$32,400<sup>h</sup></b> | <b>\$1,188<sup>h</sup></b> | <b>\$2,016<sup>k</sup></b> | <b>\$1,056<sup>k</sup></b> |
| <b>Avg. cost of admin.</b>                 | \$0                      | \$70 <sup>f</sup>   |                             | \$70                       |                            | \$70                       |
| <b>Total cost of admin.</b>                | <b>\$0</b>               | <b>\$420</b>        |                             | <b>\$420</b>               |                            | <b>\$580</b>               |
| <b>Rate of grade 3-4 side effects (%)*</b> |                          |                     |                             |                            |                            |                            |
| Neutropenia                                | 0                        | 31.4                |                             | 11.5                       |                            | 52.4                       |
| Thrombocytopenia                           | 0                        | 1.7                 |                             | 3.8                        |                            | 2.4                        |
| Febrile Neutropenia                        | 0                        | 5.8                 |                             |                            |                            | 7.1                        |
| Cramp/nausea                               | 0                        | 16.1                |                             | 3.8                        |                            | 11.9                       |
| Diarrhea                                   | 0                        | 31                  |                             | 3.8                        |                            | 4.8                        |
| Vomiting                                   | 0                        | 12.1                |                             | 3.8                        |                            | 7.1                        |
| <b>Cost of side effect management*</b>     | <b>\$0</b>               | <b>\$3,012</b>      |                             | <b>\$1,066</b>             |                            | <b>\$4,129</b>             |
| <b>Total cost of therapy</b>               |                          | <b>\$6,702</b>      |                             | <b>\$35,074</b>            |                            | <b>\$7,781</b>             |

Doses were calculated for a 1.75 m<sup>2</sup> patient. Unused portions of chemotherapy vials were discarded in calculations. Cost for administering chemo IV was conservatively fixed at \$70 per cycle. Minocycline was assumed to be taken orally at a dose of 100 mg/day; however, dose could be escalated to 200 mg/day while maintaining safety and low cost. Broken down costs were calculated for minocycline only, total cost was calculated as full dose Irinotecan + cost for minocycline over a full chemotherapy schedule. Irinotecan monotherapy was calculated for 125 mg/m<sup>2</sup>, 4 doses per cycle for 6 cycles. Bevacizumab and Etoposide combination regimens both used 60 mg/m<sup>2</sup> for up to 6 cycles.

\*See toxicity related costs file (Table S4)

<sup>a</sup> Online pharmacy price (2017)

<sup>b</sup> One per day for 6 months

<sup>c</sup> FDA product label—125 mg/m<sup>2</sup> for 1.75 m<sup>2</sup> person

<sup>d</sup> 6 vials of 40 mg, \$22/vial

<sup>e</sup> 4 treatments/cycle (FDA label) for 6 cycles

<sup>f</sup> Table 1; Daniel Ruiz-Sánchez *et al.* Cost-effectiveness analysis of the bevacizumab-irinotecan regimen in the treatment of primary glioblastoma multiforme recurrences. *Oncol Lett.* 2016 Sep; 12(3): 1935–1940.

<sup>g</sup> 5 mg/kg, 75 kg person – Ying Liu *et al.* Low-dose-intensity bevacizumab with weekly irinotecan for platinum- and taxanes-resistant epithelial ovarian cancer. *Cancer Chemother Pharmacol.* 2015; 75(3): 645–651.

<sup>h</sup> Follow same regimen as (g)—two Bevacizumab treatments per cycle, 3 Irinotecan treatments of 60 mg/m<sup>2</sup> per cycle (1.75 m<sup>2</sup> person, 40 mg/vial, \$22/vial), for up to 6 cycles (\$32,400 from Bevacizumab alone)

<sup>i</sup> Shoji T *et al.* Phase II clinical study of the combination chemotherapy regimen of irinotecan plus oral etoposide for the treatment of recurrent ovarian cancer. *Int J Gynecol Cancer.* 2011 Jan;21(1):44-50.

<sup>j</sup> Schedule from (i)—one dose on days 1-21, 28 day cycles, average of 8 cycles

<sup>k</sup> Same regimen as (i)—follow etoposide schedule, 2 irinotecan treatments of 60 mg/m<sup>2</sup> per cycle (1.75 m<sup>2</sup> person, 40 mg/vial, \$22/vial) for 8 cycles (\$2,016 from etoposide alone)
