# Supplementary material
Source: PubMed Central journal article supplement (PMC5805648)
Supplement: NIHMS922666-supplement-4.pdf [file NIHMS922666-supplement-4.pdf]

1 Table. S4. Preliminary analysis of costs related to the side effect management for irinotecan-  
 2 based combination therapies.

| Complication (grade 3-4)                       | Direct cost of comp. management | Minocycline + Irinotecan (Iri) |                            | Bevacizumab + Irinotecan |                            | Etoposide + Irinotecan |                            |
|------------------------------------------------|---------------------------------|--------------------------------|----------------------------|--------------------------|----------------------------|------------------------|----------------------------|
|                                                |                                 | Rate of comp. (%) **           | Estimated cost from comps. | Rate of comp. (%) ¶      | Estimated cost from comps. | Rate of comp. (%) §    | Estimated cost from comps. |
| Neutropenia *                                  | \$7,546                         | 31.4                           | \$2369.5                   | 11.5                     | \$867.8                    | 52.4                   | \$3,954.2                  |
| Thrombocytopenia *                             | \$3,268                         | 1.7                            | \$55.6                     | 3.8                      | \$124.2                    | 2.4                    | \$78.5                     |
| Febrile Neutropenia                            |                                 | 5.8                            |                            |                          |                            | 7.1                    |                            |
| Cramp/nausea                                   |                                 | 16.1                           |                            | 3.8                      |                            | 11.9                   |                            |
| Diarrhea                                       | \$1,860                         | 31                             | \$576.6                    | 3.8                      | \$70.7                     | 4.8                    | \$89.3                     |
| Vomiting (per cycle)                           | \$85                            | 12.1                           | \$10.3                     | 3.8                      | \$3.3                      | 7.1                    | \$6.1                      |
| <b>Total expected costs from complications</b> |                                 |                                | <b>\$3,012</b>             |                          | <b>\$1,066</b>             |                        | <b>\$4,129</b>             |

\*Calhoun *et al.* Evaluating the Total Costs of Chemotherapy-Induced Toxicity: Results from a Pilot Study with Ovarian Cancer Patients. *Oncologist*. 2001;6(5):441-5.

\*\*Rate of combination for irinotecan – Source: Camptosar FDA label

¶ Ying Liu *et al.* Low-dose-intensity bevacizumab with weekly irinotecan for platinum- and taxanes-resistant epithelial ovarian cancer. *Cancer Chemother Pharmacol*. 2015; 75(3): 645–651.

§ Shoji T *et al.* Phase II clinical study of the combination chemotherapy regimen of irinotecan plus oral etoposide for the treatment of recurrent ovarian cancer. *Int J Gynecol Cancer*. 2011 Jan;21(1):44-50.
