# Supplementary material
Source: PubMed Central journal article supplement (PMC5805648)
Supplement: NIHMS922666-supplement-5.pdf [file NIHMS922666-supplement-5.pdf]

**Figure S1**

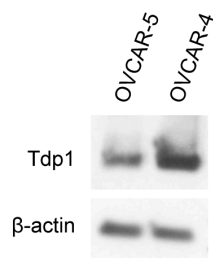

**Figure S1. Platinum-resistant human epithelial ovarian cancer cell lines OVCAR-5 and OVCAR-4 expresses tyrosyl-DNA phosphodiesterase 1 (Tdp1).** The Tdp1 protein expression levels in human epithelial ovarian carcinoma cell lines OVCAR-5 (derived from the ascitic fluid of EOC patient without prior treatment; tumor characterized to be platinum-resistant) and OVCAR-4 (derived from the ascitic fluid of platinum-refractory EOC patient) were evaluated by Western Blot. Tdp1 expression was found higher in the OVCAR-4 cells compared to that in the OVCAR-5 cells.
