# Supplementary material
Source: PubMed Central journal article supplement (PMC5805648)
Supplement: NIHMS922666-supplement-6.pdf [file NIHMS922666-supplement-6.pdf]

**Figure S2**

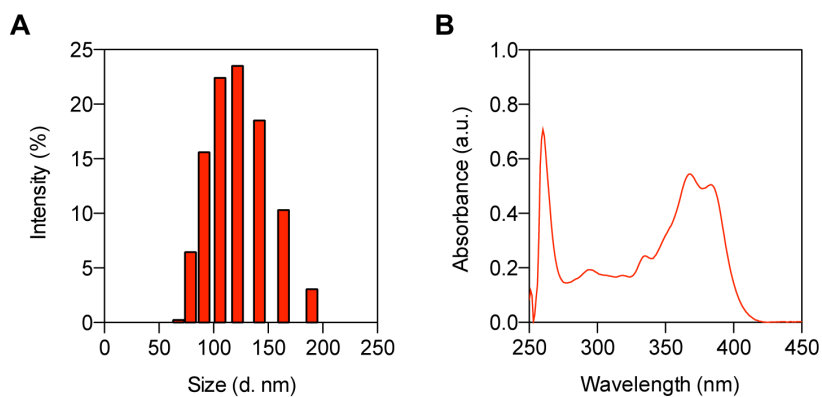

**Figure S2. Representative size distribution of nanoliposomal irinotecan (nal-IRI) and absorbance spectrum of nal-IRI in DMSO.** (A) Mono-dispersed nal-IRI is approximately 115 nm in diameter with a Polydispersity index below 0.1. (B) Nal-IRI absorbance spectrum was measured in DMSO, and the irinotecan concentration was determined by UV-Vis spectroscopy with appropriate standard curves.
